# Supplementary material
Source: PubMed Central journal article supplement (PMC7792658)

Supplemental Material for "Effect of Phosphate-specific Diet Therapy on Phosphate Levels in Adults Undergoing Maintenance Hemodialysis"

Supplement 1. Supplement 1. Adapted PRISMA Checklist for Systematic Reviews.....pg. 2

Supplement 2. Databases Search to Identify Articles Addressing the PICO Question: In Individuals with CKD, what is the Effect of Medical Nutrition Therapy provided by a Registered Dietitian Nutritionist or international equivalent on Nutrition Outcomes?.....pg. 3

Supplement 3. Funnel Plots Demonstrating Publication Bias for the Outcomes a) Serum Phosphorus Levels and b) Hyperphosphatemia.....pg. 20

Supplement 4. Sensitivity Analysis for Meta-Analysis Demonstrating the Effect of Phosphorus-Focused MNT Delivered by a Dietitian on Serum Phosphate Levels according to a) Baseline Serum Phosphate Levels  $\geq 5.5$  mg/dL and b) Study Risk of Bias.....pg. 22

## Supplement 1. Adapted PRISMA Checklist for Systematic Reviews

**CJASN**  
Clinical Journal of American Society of Nephrology

**JASN**  
Journal of the American Society of Nephrology

Manuscript ID:

### Adapted\* PRISMA Checklist for Systematic Reviews

| Section/Topic                             | Checklist Item                                                                                                                                                                                                 | Response                     |
|-------------------------------------------|----------------------------------------------------------------------------------------------------------------------------------------------------------------------------------------------------------------|------------------------------|
| <b>Background</b>                         | An explicit statement of questions being addressed with reference to participants, interventions, comparisons, outcomes, and study designs (PICOS).                                                            | Yes <input type="checkbox"/> |
| <b>METHODS</b>                            |                                                                                                                                                                                                                |                              |
| <b>Protocol and Registration</b>          | Indicates if a review protocol exists and if and when it can be accessed.                                                                                                                                      | Yes <input type="checkbox"/> |
|                                           | Indicates if the protocol has been registered, and if so, provides registration number.                                                                                                                        | Yes <input type="checkbox"/> |
| <b>Eligibility Criteria</b>               | Specifies study characteristics (e.g., PICOS, length of follow-up) and reports characteristics (e.g. years considered, language, publication status used as criteria for eligibility).                         | Yes <input type="checkbox"/> |
| <b>Information Sources</b>                | Describes all information sources (e.g. database with dates of coverage, contact with study authors to identify additional studies) in the search and the date last searched.                                  | Yes <input type="checkbox"/> |
| <b>Search</b>                             | Presents full electronic search strategy for at least one database, including any limits used, such that it could be repeated.                                                                                 | Yes <input type="checkbox"/> |
| <b>Study Selection</b>                    | States the process for selecting studies (e.g. screening, eligibility, included in systematic review and/or inclusion in meta-analyses).                                                                       | Yes <input type="checkbox"/> |
| <b>Data Collection Process</b>            | Describes the method of data extraction from reports (e.g., piloted forms, independently, in duplicate) and any processes for obtaining and confirming data from investigators.                                | Yes <input type="checkbox"/> |
| <b>Data Items</b>                         | Lists and defines all variables for which data were sought (e.g., PICOS, funding sources) and any assumptions and simplifications made.                                                                        | Yes <input type="checkbox"/> |
| <b>Risk of Bias in Individual Studies</b> | Describes methods used for assessing risk of bias of individual studies (including specification of whether this was done at the study or outcome level), and this information was used in any data synthesis. | Yes <input type="checkbox"/> |
| <b>Summary Measures</b>                   | States the principal summary measures (e.g., risk ratios, difference in means).                                                                                                                                | Yes <input type="checkbox"/> |
| <b>Synthesis of Results</b>               | Describes the methods of handling data and combining results of studies, if done, including measures of consistency ( $I^2$ ) for each meta-analysis.                                                          | Yes <input type="checkbox"/> |
| <b>RESULTS</b>                            |                                                                                                                                                                                                                |                              |
| <b>Study Selection</b>                    | The numbers of studies screened, assessed for eligibility, and included in the review, with reasons for exclusion at each stage                                                                                | Yes <input type="checkbox"/> |
| <b>Study Characteristics</b>              | Characteristics for which data were extracted from each study (e.g., study size, PICOS, follow-up period).                                                                                                     | Yes <input type="checkbox"/> |
| <b>Risk of Bias Across Studies</b>        | Presents results of any assessment of risk of bias across studies.                                                                                                                                             | Yes <input type="checkbox"/> |
| <b>Additional Analyses</b>                | Gives results of secondary analyses (e.g., sensitivity or sub-group analyses, meta-regression).                                                                                                                | Yes <input type="checkbox"/> |

Supplement 2. Databases Search to Identify Articles Addressing the PICO Question: In Individuals with CKD, what is the Effect of Medical Nutrition Therapy provided by a Registered Dietitian Nutritionist or international equivalent on Nutrition Outcomes?

Chronic Kidney Disease  
FINAL database searches  
2019-11-23

## Summary

| Database                                                  | Hits        |
|-----------------------------------------------------------|-------------|
| MEDLINE (Ovid)                                            | 1085        |
| Embase (Ovid)                                             | 4457        |
| CINAHL (Ebsco)                                            | 377         |
| Web of Science                                            | 782         |
| Cochrane Central Register of Controlled Trials (Ovid)     | 1203        |
| Cochrane Database of Systematic Reviews (Ovid)            | 88          |
| Health Technology Assessment Database (Ovid)              | 4           |
| Database of Abstracts of Reviews of Effects (DARE) (Ovid) | 58          |
| <b>Total Downloaded Citations</b>                         | <b>8054</b> |
| <b>Duplicates Removed</b>                                 | <b>2352</b> |
| <b>Total to screen at title/abstract stage</b>            | <b>5702</b> |

### Notes:

Chronic Kidney Disease filter comes from: Iansavichus et al, 2015. Narrow version used with modifications (terms added for kidney transplants and "NOT allograft" concept removed).

Iansavichus AV, Hildebrand AM, Haynes RB, Wilczynski NL, Levin A, Hemmelgarn BR, Tu K, Nesrallah GE, Nash DM, Garg AX. High-performance information search filters for CKD content in PubMed, Ovid MEDLINE, and EMBASE. American Journal of Kidney Diseases. 2015 Jan 1;65(1):26-32.

Study design search filters:

- RCT/ Non-RCT: Designed by Becky Skidmore and colleagues at CADTH.
- Systematic reviews: Designed by information specialist team at CADTH and freely available online from: <https://www.cadth.ca/resources/finding-evidence/strings-attached-cadths-database-search-filters#syst> (used with modifications)

Search filters should be acknowledged in all publications.

MEDLINE/ Embase/ Cochrane CENTRAL/ Cochrane Database of Systematic Reviews/ Health Technology Assessment database/ DARE

- [Support & Training- opens in a new window](#)

- [Feedback- opens in a new window](#)
- Logged in as Amanda Wanner
- [Close](#)

Database(s): EBM Reviews - Cochrane Central Register of Controlled Trials October 2019, EBM Reviews - Cochrane Database of Systematic Reviews 2005 to November 20, 2019, EBM Reviews - Database of Abstracts of Reviews of Effects 1st Quarter 2016, EBM Reviews - Health Technology Assessment 4th Quarter 2016, Embase 1974 to 2019 November 22, Ovid MEDLINE(R) and Epub Ahead of Print, In-Process & Other Non-Indexed Citations and Daily 1946 to November 22, 2019

Search Strategy:

| #  | Searches                                                                                                                                                                                                           | Results |
|----|--------------------------------------------------------------------------------------------------------------------------------------------------------------------------------------------------------------------|---------|
| 1  | exp *Renal Insufficiency, Chronic/                                                                                                                                                                                 | 125824  |
| 2  | ((chronic or diabetic or advanced) adj kidney).tw.                                                                                                                                                                 | 133703  |
| 3  | ((end stage or endstage) adj (kidney or renal)).ti.                                                                                                                                                                | 22035   |
| 4  | ((h?emodialysis or dialysis or ur?emic) adj patient\$).mp.                                                                                                                                                         | 107510  |
| 5  | ((kidney or renal) adj (disease or insufficiency)).ti.                                                                                                                                                             | 115372  |
| 6  | (h?emodia\$ or dialys\$).ti. or ckd.tw.                                                                                                                                                                            | 268371  |
| 7  | ((chronic or progressive) adj (kidney or renal or ur?emi\$)).ti.                                                                                                                                                   | 83606   |
| 8  | *Diabetic Nephropathies/                                                                                                                                                                                           | 27492   |
| 9  | exp Peritoneal Dialysis/                                                                                                                                                                                           | 66728   |
| 10 | (nephrosclerosis or glomerulosclerosis or glomerular sclerosis).ti.                                                                                                                                                | 7157    |
| 11 | macroalbuminuri\$.tw.                                                                                                                                                                                              | 4741    |
| 12 | *Renal Osteodystrophy/                                                                                                                                                                                             | 5140    |
| 13 | ((kidney or renal or interstitial) adj fibrosis).ti.                                                                                                                                                               | 5788    |
| 14 | calciphylaxis.tw.                                                                                                                                                                                                  | 2771    |
| 15 | Denys-Drash Syndrome/                                                                                                                                                                                              | 559     |
| 16 | renal hyperparathyroidism.tw.                                                                                                                                                                                      | 695     |
| 17 | polycystic kidney\$.ti.                                                                                                                                                                                            | 11164   |
| 18 | ((kidney or renal) and (ckf or crd or crf or eskd or eskf or esrd or esrf)).mp.                                                                                                                                    | 59217   |
| 19 | ((chronic\$ or severe or catheter\$ or pd or capd or hd) and (dialy\$ or h?emodialy\$ or renal replacement or azot?emia)).mp.                                                                                      | 261954  |
| 20 | (exp *Kidney Diseases/ or ((kidney or renal) adj disease).mp. or dialy\$.mp. or ur?emi\$.mp.) and (calcification.tw. or hyperparathyroidism.mp. or (left ventricul\$ adj2 hypertroph\$).mp. or hypercalc?emia.mp.) | 44115   |
| 21 | (Disease Progression/ or Chronic Disease/ or ((kidney or renal) adj function).ti. or proteinuri\$.ti.) and (*Kidney Diseases/ or *Renal Insufficiency/ or *Renal Artery Obstruction/)                              | 12710   |
| 22 | (diabet\$.ti. or Disease Progression/) and (nephropath\$ or m?croalbuminuri\$ or albuminuri\$.ti.                                                                                                                  | 31636   |

|    |                                                                                                                                                                                                                                                                                                                        |         |
|----|------------------------------------------------------------------------------------------------------------------------------------------------------------------------------------------------------------------------------------------------------------------------------------------------------------------------|---------|
| 23 | *Kidney Transplantation/                                                                                                                                                                                                                                                                                               | 152819  |
| 24 | ((kidney transplant* or renal transplant*) and (recipients or candidates or wait list or waiting list*)).tw.                                                                                                                                                                                                           | 86587   |
| 25 | or/1-24 [CKD]                                                                                                                                                                                                                                                                                                          | 773817  |
| 26 | dietetics/ or nutritionists/                                                                                                                                                                                                                                                                                           | 24315   |
| 27 | nutrition therapy/ or exp diet/ or exp diet therapy/ or nutrition assessment/ or nutritional requirements/ or feeding behavior/                                                                                                                                                                                        | 1045856 |
| 28 | (dietetic* or dietitian* or dietician* or nutritionist* or dieteticien* or dietisten* or nutricionista*).tw,kf.                                                                                                                                                                                                        | 46960   |
| 29 | (medically-tailored adj3 nutrition*).tw,kf.                                                                                                                                                                                                                                                                            | 1       |
| 30 | ((diet* or nutrition*) adj3 (counsel* or advice or consultation* or intervention or behavio* or program* or service* or assessment* or therap* or individuali?ed or personali?ed or habit* or recommendation* or change* or improve* or education* or support* or self-manage* or management or prescription*)).tw,kf. | 327657  |
| 31 | ((low or restrict* or reduc* or free) adj2 protein adj2 diet*).tw,kf.                                                                                                                                                                                                                                                  | 16063   |
| 32 | ((low or restrict* or reduc* or free) adj2 (sodium or salt) adj2 diet*).tw,kf.                                                                                                                                                                                                                                         | 11643   |
| 33 | or/26-32 [NUTRITION]                                                                                                                                                                                                                                                                                                   | 1254014 |
| 34 | 25 and 33                                                                                                                                                                                                                                                                                                              | 29802   |
| 35 | (controlled clinical trial or randomized controlled trial or equivalence trial or pragmatic clinical trial).pt.                                                                                                                                                                                                        | 1208339 |
| 36 | clinical trials as topic.sh.                                                                                                                                                                                                                                                                                           | 227556  |
| 37 | Randomized Controlled Trials as Topic/                                                                                                                                                                                                                                                                                 | 241538  |
| 38 | (randomi#ed or randomi#ation? or randomly or RCT or placebo*).tw,kf.                                                                                                                                                                                                                                                   | 3295664 |
| 39 | ((singl* or doubl* or trebl* or tripl*) adj (mask* or blind* or dumm*)).tw,kf.                                                                                                                                                                                                                                         | 682824  |
| 40 | trial.ti.                                                                                                                                                                                                                                                                                                              | 800394  |
| 41 | or/35-40 [RCTs]                                                                                                                                                                                                                                                                                                        | 4099668 |
| 42 | controlled clinical trial.pt.                                                                                                                                                                                                                                                                                          | 197223  |
| 43 | exp Clinical Trial/ or Controlled Clinical Trials as Topic/                                                                                                                                                                                                                                                            | 2304894 |
| 44 | (control* adj2 trial*).tw,kf.                                                                                                                                                                                                                                                                                          | 893920  |
| 45 | Non-Randomized Controlled Trials as Topic/                                                                                                                                                                                                                                                                             | 11045   |
| 46 | (nonrandom* or non-random* or quasi-random* or quasi-experiment*).tw,kf.                                                                                                                                                                                                                                               | 143201  |
| 47 | (nRCT or nRCTs or non-RCT?).tw,kf.                                                                                                                                                                                                                                                                                     | 2899    |
| 48 | Controlled Before-After Studies/                                                                                                                                                                                                                                                                                       | 195842  |
| 49 | (control* adj3 ("before and after" or "before after")).tw,kf.                                                                                                                                                                                                                                                          | 733975  |
| 50 | Interrupted Time Series Analysis/                                                                                                                                                                                                                                                                                      | 188305  |
| 51 | time series.tw,kf.                                                                                                                                                                                                                                                                                                     | 63442   |
| 52 | (pre- adj3 post-).tw,kf.                                                                                                                                                                                                                                                                                               | 245629  |

|    |                                                                                                                                                                                                                                                                                                             |          |
|----|-------------------------------------------------------------------------------------------------------------------------------------------------------------------------------------------------------------------------------------------------------------------------------------------------------------|----------|
| 53 | (pretest adj3 posttest).tw,kf.                                                                                                                                                                                                                                                                              | 13922    |
| 54 | Historically Controlled Study/                                                                                                                                                                                                                                                                              | 206374   |
| 55 | (control* adj2 stud\$3).tw,kf.                                                                                                                                                                                                                                                                              | 648803   |
| 56 | Control Groups/                                                                                                                                                                                                                                                                                             | 112191   |
| 57 | (control* adj2 group\$1).tw,kf.                                                                                                                                                                                                                                                                             | 1391037  |
| 58 | trial.ti.                                                                                                                                                                                                                                                                                                   | 800394   |
| 59 | or/42-58 [NON-RCTs]                                                                                                                                                                                                                                                                                         | 5406408  |
| 60 | systematic review.pt.                                                                                                                                                                                                                                                                                       | 124841   |
| 61 | exp systematic reviews as topic/                                                                                                                                                                                                                                                                            | 27040    |
| 62 | meta analysis.pt.                                                                                                                                                                                                                                                                                           | 108129   |
| 63 | exp meta-analysis as topic/                                                                                                                                                                                                                                                                                 | 59759    |
| 64 | (meta-analy* or metanaly* or metaanaly* or met analy* or integrative research or integrative review* or integrative overview* or research integration or research overview* or collaborative review*).tw,kf.                                                                                                | 425002   |
| 65 | (systematic review* or systematic overview* or evidence-based review* or evidence-based overview* or (evidence adj3 (review* or overview*)) or meta-review* or meta-overview* or meta-synthes* or rapid review* or "review of reviews" or umbrella review? or technology assessment* or HTA or HTAs).tw,kf. | 525378   |
| 66 | exp Technology assessment, biomedical/                                                                                                                                                                                                                                                                      | 25159    |
| 67 | (cochrane or health technology assessment or evidence report or systematic reviews).jw.                                                                                                                                                                                                                     | 57976    |
| 68 | (network adj (meta-analy* or metanaly* or metaanaly* or met analy*)).tw,kf.                                                                                                                                                                                                                                 | 10262    |
| 69 | (network adj (MA or MAs)).tw,kf.                                                                                                                                                                                                                                                                            | 27       |
| 70 | (NMA or NMAs or MTC or MTCs or MAIC or MAICs).tw,kf.                                                                                                                                                                                                                                                        | 17631    |
| 71 | indirect* compar*.tw,kf.                                                                                                                                                                                                                                                                                    | 6538     |
| 72 | (indirect treatment* adj1 compar*).tw,kf.                                                                                                                                                                                                                                                                   | 921      |
| 73 | (mixed treatment* adj1 compar*).tw,kf.                                                                                                                                                                                                                                                                      | 1542     |
| 74 | (multiple treatment* adj1 compar*).tw,kf.                                                                                                                                                                                                                                                                   | 432      |
| 75 | simultaneous* compar*.tw,kf.                                                                                                                                                                                                                                                                                | 2378     |
| 76 | mixed comparison?.tw,kf.                                                                                                                                                                                                                                                                                    | 128      |
| 77 | or/60-76 [SRs/NMAs/MAs]                                                                                                                                                                                                                                                                                     | 883133   |
| 78 | 34 and (41 or 59 or 77)                                                                                                                                                                                                                                                                                     | 8377     |
| 79 | exp Animals/ not (exp Animals/ and Humans/)                                                                                                                                                                                                                                                                 | 17003466 |
| 80 | 78 not 79 [ANIMAL-ONLY REMOVED]                                                                                                                                                                                                                                                                             | 5616     |
| 81 | exp Child/ not (exp Adult/ or Adolescent/)                                                                                                                                                                                                                                                                  | 2345108  |
| 82 | exp Infant/ not (exp Adult/ or Adolescent/)                                                                                                                                                                                                                                                                 | 1395373  |

|           |                                                                                                                                                                                                              |             |
|-----------|--------------------------------------------------------------------------------------------------------------------------------------------------------------------------------------------------------------|-------------|
| 83        | 80 not (81 or 82) [CHILD- AND INFANT-ONLY REMOVED]                                                                                                                                                           | 5537        |
| 84        | (comment or editorial or news or newspaper article).pt.                                                                                                                                                      | 2006783     |
| 85        | 83 not 84 [OPINION PIECES REMOVED]                                                                                                                                                                           | 5493        |
| 86        | 85 and English.lg.                                                                                                                                                                                           | 4898        |
| 87        | limit 86 to yr="2000 -Current" [Limit not valid in DARE; records were retained]                                                                                                                              | 3850        |
| <b>88</b> | <b>87 use ppez</b>                                                                                                                                                                                           | <b>1085</b> |
| 89        | (h?emodia\$ or dialy\$).ti.                                                                                                                                                                                  | 200192      |
| 90        | chronic kidney disease.mp.                                                                                                                                                                                   | 143927      |
| 91        | ((h?emodialysis or dialysis or ur?emic) adj patient\$).tw.                                                                                                                                                   | 100850      |
| 92        | *hemodialysis/                                                                                                                                                                                               | 110074      |
| 93        | ((chronic or diabetic or advanced) adj kidney).tw.                                                                                                                                                           | 133703      |
| 94        | ((kidney or renal) adj (disease or insufficiency)).ti. or ckd.mp.                                                                                                                                            | 157146      |
| 95        | ((chronic or progressive) adj (kidney or renal or ur?emi\$)).ti.                                                                                                                                             | 83606       |
| 96        | hemodialysis patient/                                                                                                                                                                                        | 26902       |
| 97        | *peritoneal dialysis/                                                                                                                                                                                        | 30120       |
| 98        | *diabetic nephropathy/                                                                                                                                                                                       | 36989       |
| 99        | ((end stage or endstage) adj (kidney or renal)).ti.                                                                                                                                                          | 22035       |
| 100       | *chronic kidney failure/                                                                                                                                                                                     | 106581      |
| 101       | *hemodialysis patient/                                                                                                                                                                                       | 12122       |
| 102       | (nephrosclerosis or glomerulosclerosis or glomerular sclerosis).ti.                                                                                                                                          | 7157        |
| 103       | macroalbuminuri\$.tw.                                                                                                                                                                                        | 4741        |
| 104       | uremic toxin/                                                                                                                                                                                                | 1647        |
| 105       | ((kidney or renal or interstitial) adj fibrosis).ti.                                                                                                                                                         | 5788        |
| 106       | calciphylaxis.tw.                                                                                                                                                                                            | 2771        |
| 107       | *denys drash syndrome/                                                                                                                                                                                       | 211         |
| 108       | renal hyperparathyroidism.tw.                                                                                                                                                                                | 695         |
| 109       | ((kidney or renal) and (ckf or crd or crf or eskd or eskf or esrd or esrf)).mp.                                                                                                                              | 59217       |
| 110       | (h?emodialy\$ or dialy\$).mp. and (*kidney failure/ or proteinuri\$.tw. or ur?emi\$.tw. or diabetic nephropathy.tw. or (pd or capd or hd).mp.)                                                               | 119822      |
| 111       | (blood vessel calcification/ or *secondary hyperparathyroidism/ or secondary hyperparathyroidism.tw.) and "Urology and nephrology".ec.                                                                       | 5108        |
| 112       | (diabet\$ and (nephropath\$ or renal or m?croalbuminuri\$ or albuminuri\$)).ti.                                                                                                                              | 45602       |
| 113       | (((kidney or renal) adj fibrosis) or glomerulosclerosis or ventricl\$ hypertrophy).mp. or *kidney dysfunction/) and ((chronic adj (kidney or renal)) or ((end-stage or endstage) adj (kidney or renal))).mp. | 17723       |
| 114       | exp *kidney transplantation/                                                                                                                                                                                 | 177583      |

|     |                                                                                                                                                                                                                                                                                                                        |         |
|-----|------------------------------------------------------------------------------------------------------------------------------------------------------------------------------------------------------------------------------------------------------------------------------------------------------------------------|---------|
| 115 | ((kidney transplant* or renal transplant*) and (recipients or candidates or wait list or waiting list*)).tw.                                                                                                                                                                                                           | 86587   |
| 116 | or/89-115 [CKD]                                                                                                                                                                                                                                                                                                        | 752235  |
| 117 | dietetics/ or dietitian/                                                                                                                                                                                                                                                                                               | 24315   |
| 118 | exp diet/ or exp diet therapy/ or nutrition education/ or nutritional counseling/ or nutritional requirement/ or feeding behavior/                                                                                                                                                                                     | 1025046 |
| 119 | (dietetic* or dietitian* or dietician* or nutritionist* or dieteticien* or dietisten* or nutricionista*).tw,kw.                                                                                                                                                                                                        | 45834   |
| 120 | (medically-tailored adj3 nutrition*).tw,kw.                                                                                                                                                                                                                                                                            | 2       |
| 121 | ((diet* or nutrition*) adj3 (counsel* or advice or consultation* or intervention or behavio* or program* or service* or assessment* or therap* or individuali?ed or personali?ed or habit* or recommendation* or change* or improve* or education* or support* or self-manage* or management or prescription*)).tw,kw. | 333145  |
| 122 | ((low or restrict* or reduc* or free) adj2 protein adj2 diet*).tw,kw.                                                                                                                                                                                                                                                  | 16135   |
| 123 | ((low or restrict* or reduc* or free) adj2 (sodium or salt) adj2 diet*).tw,kw.                                                                                                                                                                                                                                         | 11494   |
| 124 | or/117-123 [NUTRITION]                                                                                                                                                                                                                                                                                                 | 1246962 |
| 125 | 116 and 124                                                                                                                                                                                                                                                                                                            | 29144   |
| 126 | randomized controlled trial/                                                                                                                                                                                                                                                                                           | 1076436 |
| 127 | controlled clinical trial/                                                                                                                                                                                                                                                                                             | 556468  |
| 128 | "clinical trial (topic)"/                                                                                                                                                                                                                                                                                              | 106230  |
| 129 | Randomized Controlled Trials as Topic/                                                                                                                                                                                                                                                                                 | 241538  |
| 130 | (randomi#ed or randomi#ation? or randomly or RCT or placebo*).tw,kw.                                                                                                                                                                                                                                                   | 3350747 |
| 131 | ((singl* or doubl* or trebl* or tripl*) adj (mask* or blind* or dumm*)).tw,kw.                                                                                                                                                                                                                                         | 707651  |
| 132 | trial.ti.                                                                                                                                                                                                                                                                                                              | 800394  |
| 133 | or/126-132 [RCTs]                                                                                                                                                                                                                                                                                                      | 4174258 |
| 134 | exp clinical trial/                                                                                                                                                                                                                                                                                                    | 2290895 |
| 135 | exp "clinical trial (topic)"/                                                                                                                                                                                                                                                                                          | 311877  |
| 136 | (control* adj2 trial*).tw,kw.                                                                                                                                                                                                                                                                                          | 1171336 |
| 137 | (nonrandom* or non-random* or quasi-random* or quasi-experiment*).tw,kw.                                                                                                                                                                                                                                               | 143526  |
| 138 | (nRCT or nRCTs or non-RCT\$1).tw,kw.                                                                                                                                                                                                                                                                                   | 2899    |
| 139 | (control* adj3 ("before and after" or "before after")).tw,kw.                                                                                                                                                                                                                                                          | 733980  |
| 140 | time series analysis/                                                                                                                                                                                                                                                                                                  | 24431   |
| 141 | time series.tw,kw.                                                                                                                                                                                                                                                                                                     | 64365   |
| 142 | pretest posttest control group design/                                                                                                                                                                                                                                                                                 | 429     |
| 143 | (pre- adj3 post-).tw,kw.                                                                                                                                                                                                                                                                                               | 245669  |
| 144 | (pretest adj3 posttest).tw,kw.                                                                                                                                                                                                                                                                                         | 14693   |



|     |                                                                                                                                                                                                                                                                                                                          |          |
|-----|--------------------------------------------------------------------------------------------------------------------------------------------------------------------------------------------------------------------------------------------------------------------------------------------------------------------------|----------|
| 145 | controlled study/                                                                                                                                                                                                                                                                                                        | 7055486  |
| 146 | (control* adj2 stud\$3).tw,kw.                                                                                                                                                                                                                                                                                           | 982134   |
| 147 | control group/                                                                                                                                                                                                                                                                                                           | 112089   |
| 148 | (control* adj2 group\$1).tw,kw.                                                                                                                                                                                                                                                                                          | 1391252  |
| 149 | trial.ti.                                                                                                                                                                                                                                                                                                                | 800394   |
| 150 | or/134-149 [NON-RCTs]                                                                                                                                                                                                                                                                                                    | 11258295 |
| 151 | systematic review/                                                                                                                                                                                                                                                                                                       | 342917   |
| 152 | "systematic review (topic)"/                                                                                                                                                                                                                                                                                             | 24242    |
| 153 | meta analysis/                                                                                                                                                                                                                                                                                                           | 283792   |
| 154 | "meta analysis (topic)"/                                                                                                                                                                                                                                                                                                 | 40970    |
| 155 | (meta-analy* or metanaly* or metaanaly* or met analy* or integrative<br>research or integrative review* or integrative overview* or research<br>integration or research overview* or collaborative review*).tw,kw.                                                                                                       | 433346   |
| 156 | (systematic review* or systematic overview* or evidence-based review* or<br>evidence-based overview* or (evidence adj3 (review* or overview*)) or meta-<br>review* or meta-overview* or meta-synthes* or rapid review* or "review of<br>reviews" or umbrella review? or technology assessment* or HTA or<br>HTAs).tw,kw. | 532935   |
| 157 | biomedical technology assessment/                                                                                                                                                                                                                                                                                        | 24041    |
| 158 | (cochrane or health technology assessment or evidence report or systematic<br>reviews).jw.                                                                                                                                                                                                                               | 57976    |
| 159 | network meta-analysis/                                                                                                                                                                                                                                                                                                   | 3448     |
| 160 | (network adj (meta-analy* or metanaly* or metaanaly* or met analy*)).tw,kw.                                                                                                                                                                                                                                              | 10288    |
| 161 | (network adj (MA or MAs)).tw,kw.                                                                                                                                                                                                                                                                                         | 27       |
| 162 | (NMA or NMAs or MTC or MTCs or MAIC or MAICs).tw,kw.                                                                                                                                                                                                                                                                     | 17684    |
| 163 | indirect* compar*.tw,kw.                                                                                                                                                                                                                                                                                                 | 6614     |
| 164 | (indirect treatment* adj1 compar*).tw,kw.                                                                                                                                                                                                                                                                                | 926      |
| 165 | (mixed treatment* adj1 compar*).tw,kw.                                                                                                                                                                                                                                                                                   | 1564     |
| 166 | (multiple treatment* adj1 compar*).tw,kw.                                                                                                                                                                                                                                                                                | 438      |
| 167 | (multi-treatment* adj1 compar*).tw,kw.                                                                                                                                                                                                                                                                                   | 9        |
| 168 | simultaneous* compar*.tw,kw.                                                                                                                                                                                                                                                                                             | 2378     |
| 169 | mixed comparison?.tw,kw.                                                                                                                                                                                                                                                                                                 | 129      |
| 170 | or/151-169 [SRs/NMAs/MAs]                                                                                                                                                                                                                                                                                                | 959516   |
| 171 | 125 and (133 or 150 or 170)                                                                                                                                                                                                                                                                                              | 11273    |
| 172 | exp animal experimentation/ or exp animal model/ or exp animal experiment/<br>or nonhuman/ or exp vertebrate/                                                                                                                                                                                                            | 48990537 |
| 173 | exp human/ or exp human experimentation/ or exp human experiment/                                                                                                                                                                                                                                                        | 39053486 |
| 174 | 171 not (172 not 173) [ANIMAL-ONLY REMOVED]                                                                                                                                                                                                                                                                              | 9913     |

|     |                                                                                                                                                                                                                    |         |
|-----|--------------------------------------------------------------------------------------------------------------------------------------------------------------------------------------------------------------------|---------|
| 175 | exp adolescent/ not (exp adult/ and exp adolescent/)                                                                                                                                                               | 1158882 |
| 176 | exp child/ not (exp adult/ and exp child/)                                                                                                                                                                         | 3070462 |
| 177 | fetus/ not (exp adult/ and fetus/)                                                                                                                                                                                 | 222118  |
| 178 | 174 not (175 or 176 or 177) [UNDER 18 REMOVED]                                                                                                                                                                     | 9609    |
| 179 | editorial.pt.                                                                                                                                                                                                      | 1145557 |
| 180 | 178 not 179 [OPINION PIECES REMOVED]                                                                                                                                                                               | 9519    |
| 181 | conference abstract.pt.                                                                                                                                                                                            | 3649665 |
| 182 | 180 not 181 [CONFERENCE ABSTRACTS REMOVED]                                                                                                                                                                         | 8050    |
| 183 | 182 and English.lg.                                                                                                                                                                                                | 7357    |
| 184 | limit 183 to yr="2000 -Current" [Limit not valid in DARE; records were retained]                                                                                                                                   | 6269    |
| 185 | 184 use oomezd [EMBASE]                                                                                                                                                                                            | 4457    |
| 186 | exp *Renal Insufficiency, Chronic/                                                                                                                                                                                 | 125824  |
| 187 | ((chronic or diabetic or advanced) adj kidney).tw.                                                                                                                                                                 | 133703  |
| 188 | ((end stage or endstage) adj (kidney or renal)).ti.                                                                                                                                                                | 22035   |
| 189 | ((h?emodialysis or dialysis or ur?emic) adj patient\$).mp.                                                                                                                                                         | 107510  |
| 190 | ((kidney or renal) adj (disease or insufficiency)).ti.                                                                                                                                                             | 115372  |
| 191 | (h?emodia\$ or dialys\$).ti. or ckd.tw.                                                                                                                                                                            | 268371  |
| 192 | ((chronic or progressive) adj (kidney or renal or ur?emi\$)).ti.                                                                                                                                                   | 83606   |
| 193 | *Diabetic Nephropathies/                                                                                                                                                                                           | 27492   |
| 194 | exp Peritoneal Dialysis/                                                                                                                                                                                           | 66728   |
| 195 | (nephrosclerosis or glomerulosclerosis or glomerular sclerosis).ti.                                                                                                                                                | 7157    |
| 196 | macroalbuminuri\$.tw.                                                                                                                                                                                              | 4741    |
| 197 | *Renal Osteodystrophy/                                                                                                                                                                                             | 5140    |
| 198 | ((kidney or renal or interstitial) adj fibrosis).ti.                                                                                                                                                               | 5788    |
| 199 | calciphylaxis.tw.                                                                                                                                                                                                  | 2771    |
| 200 | Denys-Drash Syndrome/                                                                                                                                                                                              | 559     |
| 201 | renal hyperparathyroidism.tw.                                                                                                                                                                                      | 695     |
| 202 | polycystic kidney\$.ti.                                                                                                                                                                                            | 11164   |
| 203 | ((kidney or renal) and (ckf or crd or crf or eskd or eskf or esrd or esrf)).mp.                                                                                                                                    | 59217   |
| 204 | ((chronic\$ or severe or catheter\$ or pd or capd or hd) and (dialy\$ or h?emodialy\$ or renal replacement or azot?emia)).mp.                                                                                      | 261954  |
| 205 | (exp *Kidney Diseases/ or ((kidney or renal) adj disease).mp. or dialy\$.mp. or ur?emi\$.mp.) and (calcification.tw. or hyperparathyroidism.mp. or (left ventricul\$ adj2 hypertroph\$).mp. or hypercalc?emia.mp.) | 44115   |

|     |                                                                                                                                                                                                                                                                                                                        |         |
|-----|------------------------------------------------------------------------------------------------------------------------------------------------------------------------------------------------------------------------------------------------------------------------------------------------------------------------|---------|
| 206 | (Disease Progression/ or Chronic Disease/ or ((kidney or renal) adj function).ti. or proteinuri\$.ti.) and (*Kidney Diseases/ or *Renal Insufficiency/ or *Renal Artery Obstruction/                                                                                                                                   | 12710   |
| 207 | (diabet\$.ti. or Disease Progression/) and (nephropath\$ or m?croalbuminuri\$ or albuminuri\$.ti.                                                                                                                                                                                                                      | 31636   |
| 208 | *Kidney Transplantation/                                                                                                                                                                                                                                                                                               | 152819  |
| 209 | ((kidney transplant* or renal transplant*) and (recipients or candidates or wait list or waiting list*)).tw.                                                                                                                                                                                                           | 86587   |
| 210 | or/186-209 [CKD]                                                                                                                                                                                                                                                                                                       | 773817  |
| 211 | dietetics/ or nutritionists/                                                                                                                                                                                                                                                                                           | 24315   |
| 212 | nutrition therapy/ or exp diet/ or exp diet therapy/ or nutrition assessment/ or nutritional requirements/ or feeding behavior/                                                                                                                                                                                        | 1045856 |
| 213 | (dietetic* or dietitian* or dietician* or nutritionist* or dieteticien* or dietisten* or nutricionista*).tw,kw.                                                                                                                                                                                                        | 45834   |
| 214 | (medically-tailored adj3 nutrition*).tw,kw.                                                                                                                                                                                                                                                                            | 2       |
| 215 | ((diet* or nutrition*) adj3 (counsel* or advice or consultation* or intervention or behavio* or program* or service* or assessment* or therap* or individuali?ed or personali?ed or habit* or recommendation* or change* or improve* or education* or support* or self-manage* or management or prescription*)).tw,kw. | 333145  |
| 216 | ((low or restrict* or reduc* or free) adj2 protein adj2 diet*).tw,kw.                                                                                                                                                                                                                                                  | 16135   |
| 217 | ((low or restrict* or reduc* or free) adj2 (sodium or salt) adj2 diet*).tw,kw.                                                                                                                                                                                                                                         | 11494   |
| 218 | or/211-217 [NUTRITION]                                                                                                                                                                                                                                                                                                 | 1258577 |
| 219 | 210 and 218                                                                                                                                                                                                                                                                                                            | 29915   |
| 220 | exp Child/ not (exp Adult/ or Adolescent/)                                                                                                                                                                                                                                                                             | 2345108 |
| 221 | exp Infant/ not (exp Adult/ or Adolescent/)                                                                                                                                                                                                                                                                            | 1395373 |
| 222 | 219 not (220 or 221) [INFANT-, CHILD-ONLY REMOVED]                                                                                                                                                                                                                                                                     | 28975   |
| 223 | conference abstract.pt.                                                                                                                                                                                                                                                                                                | 3649665 |
| 224 | 222 not 223 [CONFERENCE ABSTRACTS REMOVED]                                                                                                                                                                                                                                                                             | 24068   |
| 225 | limit 224 to yr="2000 -Current" [Limit not valid in DARE; records were retained]                                                                                                                                                                                                                                       | 17652   |
| 226 | 225 use cctr [COCHRANE CENTRAL]                                                                                                                                                                                                                                                                                        | 1203    |
| 231 | 225 use coch [COCHRANE DATABASE OF SYSTEMATIC REVIEWS]                                                                                                                                                                                                                                                                 | 88      |
| 232 | 225 use clhta [HEALTH TECHNOLOGY ASSESSMENT DATABASE]                                                                                                                                                                                                                                                                  | 4       |
| 233 | 225 use dare [DATABASE OF ABSTRACTS OF REVIEWS OF EFFECTS DATABASE]                                                                                                                                                                                                                                                    | 58      |

CINAHL

| #   | Query                                                                                                                                                                                                                                                                                                                                                                                                                                                                                                                                                                                                                                                                                                                                                                                                                                                                                                                                                                                                                                                                                                                                                                                                                                                                                                                                                                                                                                                                                                                                                                                                                                                                                                                                                                                                                                                                                                                                                                                                                                                                                                                                                                                                                                                | Results |
|-----|------------------------------------------------------------------------------------------------------------------------------------------------------------------------------------------------------------------------------------------------------------------------------------------------------------------------------------------------------------------------------------------------------------------------------------------------------------------------------------------------------------------------------------------------------------------------------------------------------------------------------------------------------------------------------------------------------------------------------------------------------------------------------------------------------------------------------------------------------------------------------------------------------------------------------------------------------------------------------------------------------------------------------------------------------------------------------------------------------------------------------------------------------------------------------------------------------------------------------------------------------------------------------------------------------------------------------------------------------------------------------------------------------------------------------------------------------------------------------------------------------------------------------------------------------------------------------------------------------------------------------------------------------------------------------------------------------------------------------------------------------------------------------------------------------------------------------------------------------------------------------------------------------------------------------------------------------------------------------------------------------------------------------------------------------------------------------------------------------------------------------------------------------------------------------------------------------------------------------------------------------|---------|
| S42 | S36 and (S37 or S38 or S39)<br>Limiters - Published Date: 20000101-20191231; English Language                                                                                                                                                                                                                                                                                                                                                                                                                                                                                                                                                                                                                                                                                                                                                                                                                                                                                                                                                                                                                                                                                                                                                                                                                                                                                                                                                                                                                                                                                                                                                                                                                                                                                                                                                                                                                                                                                                                                                                                                                                                                                                                                                        | 377     |
| S41 | S36 and (S37 or S38 or S39)<br>Limiters - English Language                                                                                                                                                                                                                                                                                                                                                                                                                                                                                                                                                                                                                                                                                                                                                                                                                                                                                                                                                                                                                                                                                                                                                                                                                                                                                                                                                                                                                                                                                                                                                                                                                                                                                                                                                                                                                                                                                                                                                                                                                                                                                                                                                                                           | 388     |
| S40 | S36 and (S37 or S38 or S39)                                                                                                                                                                                                                                                                                                                                                                                                                                                                                                                                                                                                                                                                                                                                                                                                                                                                                                                                                                                                                                                                                                                                                                                                                                                                                                                                                                                                                                                                                                                                                                                                                                                                                                                                                                                                                                                                                                                                                                                                                                                                                                                                                                                                                          | 406     |
| S39 | MH ("Meta Analysis" OR "Systematic Review") OR TI ((systematic* N2 (review* or overview*)) or (methodologic* N2 (review* or overview*))) OR ((quantitative N2 (review* or overview* or syntheses*) or (research N2 (integrati* or overview*))) OR ((integrative N2 (review* or overview*)) or (collaborative N2 (review* or overview*)) or (pool* N2 analy*)) OR ("data syntheses*" or "data extraction*" or "data abstraction*") OR (handsearch* or "hand search*") OR ("mantel haenszel" or peto or "der simonian" or dersimonian or "fixed effect*" or "latin square*") OR ("met analy*" or metanaly* or "technology assessment*" or HTA or HTAs or "technology overview*" or "technology appraisal*") OR ("meta regression*" or metaregression*) OR ("meta-analy*" or metaanaly* or "systematic review*" or "biomedical technology assessment*" or "bio-medical technology assessment*") OR (medline or cochrane or pubmed or medlars or embase or cinahl) OR (comparative N2 (efficacy or effectiveness)) OR ("outcomes research" or "relative effectiveness") OR ((indirect or "indirect treatment" or "mixed-treatment") N0 comparison*) OR AB ((systematic* N2 (review* or overview*)) or (methodologic* N2 (review* or overview*))) OR ((quantitative N2 (review* or overview* or syntheses*)) or (research N2 (integrati* or overview*))) OR ((integrative N2 (review* or overview*)) or (collaborative N2 (review* or overview*)) or (pool* N2 analy*)) OR ("data syntheses*" or "data extraction*" or "data abstraction*") OR (handsearch* or "hand search*") OR ("mantel haenszel" or peto or "der simonian" or dersimonian or "fixed effect*" or "latin square*") OR ("met analy*" or metanaly* or "technology assessment*" or HTA or HTAs or "technology overview*" or "technology appraisal*") OR ("meta regression*" or metaregression*) OR ("meta-analy*" or metaanaly* or "systematic review*" or "biomedical technology assessment*" or "bio-medical technology assessment*") OR (medline or cochrane or pubmed or medlars or embase or cinahl) OR (comparative N2 (efficacy or effectiveness)) OR ("outcomes research" or "relative effectiveness") OR ((indirect or "indirect treatment" or "mixed-treatment") N0 comparison*) | 210,294 |
| S38 | TI (trial) OR TI (control* n1 group*) or AB (control* n1 group*) OR TI (pretest n2 posttest) or AB (pretest n2 posttest) OR TI (pre n2 post) or AB (pre n2 post) OR TI "time series" or AB "time series" OR TI (control* n2 ("before and after" or                                                                                                                                                                                                                                                                                                                                                                                                                                                                                                                                                                                                                                                                                                                                                                                                                                                                                                                                                                                                                                                                                                                                                                                                                                                                                                                                                                                                                                                                                                                                                                                                                                                                                                                                                                                                                                                                                                                                                                                                   | 462,153 |

|     |                                                                                                                                                                                                                                                                                                                                                                                                                                                                                                                                                                                                          |         |
|-----|----------------------------------------------------------------------------------------------------------------------------------------------------------------------------------------------------------------------------------------------------------------------------------------------------------------------------------------------------------------------------------------------------------------------------------------------------------------------------------------------------------------------------------------------------------------------------------------------------------|---------|
|     | "before after")) or AB (control* n2 ("before and after" or "before after")) OR TI (nRCT or nRCTs or non-RCT#) or AB (nRCT or nRCTs or non-RCT#) OR TI (nonrandom* or non-random* or quasi-random* or quasi-experiment*) or AB (nonrandom* or non-random* or quasi-random* or quasi-experiment*) OR TI (control* n1 trial*) or AB (control* n1 trial*) OR (MH "Clinical Trials+") or (MH "Controlled Before-After Studies+") or (MH "Historically Controlled Study") or (MH "Interrupted Time Series Analysis") or (MH "Nonrandomized Trials") or (MH "Pretest-Posttest Design+") or (MH "Control Group") |         |
| S37 | MH ("clinical trials+" or "randomized controlled trials+") or TI (randomi#ed or randomi#ation? or randomly or RCT or placebo*) or AB (randomi#ed or randomi#ation? or randomly or RCT or placebo*) or TI ((singl* or doubl* or trebl* or tripl*) NO (mask* or blind* or dumm*)) or AB ((singl* or doubl* or trebl* or tripl*) NO (mask* or blind* or dumm*)) or TI (trial)                                                                                                                                                                                                                               | 426,520 |
| S36 | S25 and S35                                                                                                                                                                                                                                                                                                                                                                                                                                                                                                                                                                                              | 2,237   |
| S35 | S26 or S27 or S28 or S29 or S30 or S31 or S32 or S33 or S34                                                                                                                                                                                                                                                                                                                                                                                                                                                                                                                                              | 149,266 |
| S34 | ((low or restrict* or reduc* or free) NEAR/1 (sodium or salt) NEAR/1 diet*)                                                                                                                                                                                                                                                                                                                                                                                                                                                                                                                              | 6       |
| S33 | ((low or restrict* or reduc* or free) NEAR/1 (sodium or salt) NEAR/1 diet*)                                                                                                                                                                                                                                                                                                                                                                                                                                                                                                                              | 0       |
| S32 | ((low or restrict* or reduc* or free) NEAR/1 protein NEAR/1 diet*)                                                                                                                                                                                                                                                                                                                                                                                                                                                                                                                                       | 6       |
| S31 | ((low or restrict* or reduc* or free) NEAR/1 protein NEAR/1 diet*)                                                                                                                                                                                                                                                                                                                                                                                                                                                                                                                                       | 0       |
| S30 | ((diet* or nutrition*) NEAR/2 (counsel* or advice or consultation* or intervention or behavio* or program* or service* or assessment* or therap* or individuali?ed or personali?ed or habit* or recommendation* or change* or improve* or education* or support* or self-manage* or management or prescription*))                                                                                                                                                                                                                                                                                        | 23      |
| S29 | ((diet* or nutrition*) NEAR/2 (counsel* or advice or consultation* or intervention or behavio* or program* or service* or assessment* or therap* or individuali?ed or personali?ed or habit* or recommendation* or change* or improve* or education* or support* or self-manage* or management or prescription*))                                                                                                                                                                                                                                                                                        | 0       |
| S28 | (medically-tailored NEAR/2 nutrition*)                                                                                                                                                                                                                                                                                                                                                                                                                                                                                                                                                                   | 0       |
| S27 | (dietetic* or dietitian* or dietician* or nutritionist* or dieteticien* or dietisten* or nutricionista*)                                                                                                                                                                                                                                                                                                                                                                                                                                                                                                 | 14,324  |
| S26 | (MH "Dietetics") OR (MH "Nutrition Services+") OR (MH "Diet Therapy+") OR (MH "Diet+") OR (MH "Nutritional Assessment") OR (MH "Nutritional Requirements+") OR (MH "Eating Behavior+")                                                                                                                                                                                                                                                                                                                                                                                                                   | 141,468 |

|     |                                                                                                                                                                                                                            |        |
|-----|----------------------------------------------------------------------------------------------------------------------------------------------------------------------------------------------------------------------------|--------|
| S25 | S1 or S2 or S3 or S4 or S5 or S6 or S7 or S8 or S9 or S10 or S11 or S12 or S13 or S14 or S15 or S16 or S17 or S18 or S19 or S20 or S21 or S22 or S23 or S24                                                                | 60,713 |
| S24 | TI ((kidney transplant* or renal transplant*) and (recipients or candidates or wait list or waiting list*)) or AB ((kidney transplant* or renal transplant*) and (recipients or candidates or wait list or waiting list*)) | 3,568  |
| S23 | (MM "Kidney Transplantation")                                                                                                                                                                                              | 7,364  |
| S22 | (TI (diabet*) or (MH "Disease Progression")) and TI (nephropath* or m#croalbuminuri* or albuminuri*)                                                                                                                       | 2,898  |
| S21 | (MH ("Disease Progression" or "Chronic Disease") or TI ((kidney or renal) N0 function) or TI (proteinuria*)) and (MM ("Kidney Diseases" or "Renal Insufficiency" or "Renal Artery Obstruction"))                           | 2,956  |
| S20 | ((MM "Kidney Diseases+") or ((kidney or renal) N0 disease) or dialy* or ur#emi*) and (TI (calcification) or AB (calcification) or hyperparathyroidism or (left ventricul* N1 hypertroph*) or hypercalc#emia)               | 2,499  |
| S19 | ((chronic* or severe or catheter* or pd or capd or hd) and (dialy* or h#emodialy* or renal replacement or azot#emia))                                                                                                      | 19,181 |
| S18 | ((kidney or renal) and (ckf or crd or crf or eskd or eskf or esrd or esrf))                                                                                                                                                | 4,147  |
| S17 | TI (polycystic kidney*)                                                                                                                                                                                                    | 774    |
| S16 | TI (renal hyperparathyroidism) or AB (renal hyperparathyroidism)                                                                                                                                                           | 164    |
| S15 | (MH "Denys-Drash Syndrome")                                                                                                                                                                                                | 14     |
| S14 | TI (calciophylaxis) or AB (calciophylaxis)                                                                                                                                                                                 | 285    |
| S13 | TI ((kidney or renal or interstitial) N0 fibrosis)                                                                                                                                                                         | 357    |
| S12 | (MM "Renal Osteodystrophy")                                                                                                                                                                                                | 156    |
| S11 | TI (macroalbuminuri*) or AB (macroalbuminuri*)                                                                                                                                                                             | 496    |
| S10 | TI (nephrosclerosis or glomerulosclerosis or glomerular sclerosis)                                                                                                                                                         | 391    |
| S9  | (MH "Peritoneal Dialysis+")                                                                                                                                                                                                | 3,336  |
| S8  | (MM "Diabetic Nephropathies")                                                                                                                                                                                              | 3,397  |
| S7  | TI ((chronic or progressive) N0 (kidney or renal or ur#emi*))                                                                                                                                                              | 8,804  |
| S6  | TI (h#emodia* or dialys*) or TI (ckd) or AB (ckd)                                                                                                                                                                          | 23,996 |
| S5  | TI ((kidney or renal) N0 (disease or insufficiency))                                                                                                                                                                       | 13,871 |
| S4  | ((h#emodialysis or dialysis or ur#emic) N0 patient*)                                                                                                                                                                       | 10,644 |
| S3  | TI ((end stage or endstage) N0 (kidney or renal))                                                                                                                                                                          | 2,639  |

|    |                                                                                                      |        |
|----|------------------------------------------------------------------------------------------------------|--------|
| S2 | TI ((chronic or diabetic or advanced) NO kidney) or AB ((chronic or diabetic or advanced) NO kidney) | 15,308 |
| S1 | (MM "Renal Insufficiency, Chronic+")                                                                 | 18,418 |

#### Web of Science

|      |         |                                                                                                                                                                                                                                                                                                                                                                                                                                                                                                                                                                                                                                                                                                                                                                                                                                                                                                                                                                                                                                                                                                                                                                                                                     |
|------|---------|---------------------------------------------------------------------------------------------------------------------------------------------------------------------------------------------------------------------------------------------------------------------------------------------------------------------------------------------------------------------------------------------------------------------------------------------------------------------------------------------------------------------------------------------------------------------------------------------------------------------------------------------------------------------------------------------------------------------------------------------------------------------------------------------------------------------------------------------------------------------------------------------------------------------------------------------------------------------------------------------------------------------------------------------------------------------------------------------------------------------------------------------------------------------------------------------------------------------|
| #31  | 782     | (#25 and (#26 or #27 or #28)) AND LANGUAGE: (English)                                                                                                                                                                                                                                                                                                                                                                                                                                                                                                                                                                                                                                                                                                                                                                                                                                                                                                                                                                                                                                                                                                                                                               |
|      |         | Refined by: [excluding] DOCUMENT TYPES: ( EDITORIAL MATERIAL OR MEETING ABSTRACT OR PROCEEDINGS PAPER )                                                                                                                                                                                                                                                                                                                                                                                                                                                                                                                                                                                                                                                                                                                                                                                                                                                                                                                                                                                                                                                                                                             |
|      |         | Indexes=SCI-EXPANDED, SSCI, A&HCI, CPCI-S, CPCI-SSH, ESCI Timespan=2000-2019                                                                                                                                                                                                                                                                                                                                                                                                                                                                                                                                                                                                                                                                                                                                                                                                                                                                                                                                                                                                                                                                                                                                        |
| # 30 | 860     | (#25 and (#26 or #27 or #28)) AND LANGUAGE: (English)                                                                                                                                                                                                                                                                                                                                                                                                                                                                                                                                                                                                                                                                                                                                                                                                                                                                                                                                                                                                                                                                                                                                                               |
|      |         | Indexes=SCI-EXPANDED, SSCI, A&HCI, CPCI-S, CPCI-SSH, ESCI Timespan=2000-2019                                                                                                                                                                                                                                                                                                                                                                                                                                                                                                                                                                                                                                                                                                                                                                                                                                                                                                                                                                                                                                                                                                                                        |
| # 29 | 1,009   | #25 and (#26 or #27 or #28)                                                                                                                                                                                                                                                                                                                                                                                                                                                                                                                                                                                                                                                                                                                                                                                                                                                                                                                                                                                                                                                                                                                                                                                         |
|      |         | Indexes=SCI-EXPANDED, SSCI, A&HCI, CPCI-S, CPCI-SSH, ESCI Timespan=All years                                                                                                                                                                                                                                                                                                                                                                                                                                                                                                                                                                                                                                                                                                                                                                                                                                                                                                                                                                                                                                                                                                                                        |
| # 28 | 631,343 | TS=((("systematic*" near/2 ("review*" or "overview*")) or ("methodologic*" near/2 ("review*" or "overview*"))) OR (("quantitative" near/2 ("review*" or "overview*" or "synthes*")) or ("research" near/2 ("integrati*" or "overview*"))) OR (("integrative" near/2 ("review*" or "overview*")) or ("collaborative" near/2 ("review*" or "overview*")) or ("pool*" near/2 "analy*")) OR ("data synthes*" or "data extraction*" or "data abstraction*") OR ("handsearch*" or "hand search*") OR ("mantel haenszel" or "peto" or "der simonian" or "dersimonian" or "fixed effect*" or "latin square*") OR ("met analy*" or "metanaly*" or "technology assessment*" or "HTA" or "HTAs" or "technology overview*" or "technology appraisal*") OR ("meta regression*" or "metaregression*") OR ("meta-analy*" or "metaanaly*" or "systematic review*" or "biomedical technology assessment*" or "bio-medical technology assessment*") OR ("medline" or "cochrane" or "pubmed" or "medlars" or "embase" or "cinahl") OR ("comparative" near/2 ("efficacy" or "effectiveness")) OR ("outcomes research" or "relative effectiveness") OR (("indirect" or "indirect treatment" or "mixed-treatment") near/0 "comparison*")) |
|      |         | Indexes=SCI-EXPANDED, SSCI, A&HCI, CPCI-S, CPCI-SSH, ESCI Timespan=All years                                                                                                                                                                                                                                                                                                                                                                                                                                                                                                                                                                                                                                                                                                                                                                                                                                                                                                                                                                                                                                                                                                                                        |

|      |           |                                                                                                                                                                                                                                                                                                                                                                 |
|------|-----------|-----------------------------------------------------------------------------------------------------------------------------------------------------------------------------------------------------------------------------------------------------------------------------------------------------------------------------------------------------------------|
| # 27 | 1,415,150 | TS= ("control*" near/1 "trial*") OR ("nonrandom*" or "non-random*" or "quasi-random*" or "quasi-experiment*") OR ("nRCT" or "nRCTs" or "non-RCT*") OR ("control*" near/2 ("before and after" or "before after")) OR "time series" OR ("pretest" near/2 "posttest") OR ("control*" near/1 "stud*") OR ("control*" near/1 "group*") OR TI="trial"                 |
|      |           | Indexes=SCI-EXPANDED, SSCI, A&HCI, CPCI-S, CPCI-SSH, ESCI Timespan=All years                                                                                                                                                                                                                                                                                    |
| # 26 | 1,452,003 | TS=("randomi?ed" or "randomi?ation\$" or "randomly" or "RCT" or "placebo*") or TS(("singl*" or "doubl*" or "trebl*" or "tripl*") near/0 ("mask*" or "blind*" or "dumm*")) or TI=("trial")                                                                                                                                                                       |
|      |           | Indexes=SCI-EXPANDED, SSCI, A&HCI, CPCI-S, CPCI-SSH, ESCI Timespan=All years                                                                                                                                                                                                                                                                                    |
| # 25 | 4,312     | #18 and #24                                                                                                                                                                                                                                                                                                                                                     |
|      |           | Indexes=SCI-EXPANDED, SSCI, A&HCI, CPCI-S, CPCI-SSH, ESCI Timespan=All years                                                                                                                                                                                                                                                                                    |
| # 24 | 154,098   | #19 or #20 or #21 or #22 or #23                                                                                                                                                                                                                                                                                                                                 |
|      |           | Indexes=SCI-EXPANDED, SSCI, A&HCI, CPCI-S, CPCI-SSH, ESCI Timespan=All years                                                                                                                                                                                                                                                                                    |
| # 23 | 3,878     | TS(("low" or "restrict*" or "reduc*" or "free") NEAR/1 ("sodium" or "salt") NEAR/1 "diet*")                                                                                                                                                                                                                                                                     |
|      |           | Indexes=SCI-EXPANDED, SSCI, A&HCI, CPCI-S, CPCI-SSH, ESCI Timespan=All years                                                                                                                                                                                                                                                                                    |
| # 22 | 8,287     | TS(("low" or "restrict*" or "reduc*" or "free") NEAR/1 "protein" NEAR/1 "diet*")                                                                                                                                                                                                                                                                                |
|      |           | Indexes=SCI-EXPANDED, SSCI, A&HCI, CPCI-S, CPCI-SSH, ESCI Timespan=All years                                                                                                                                                                                                                                                                                    |
| # 21 | 134,502   | TS(("diet*" or "nutrition*") NEAR/2 ("counsel*" or "advice" or "consultation*" or "intervention" or "behavio*" or "program*" or "service*" or "assessment*" or "therap*" or "individuali?ed" or "personali?ed" or "habit*" or "recommendation*" or "change*" or "improve*" or "education*" or "support*" or "self-manage*" or "management" or "prescription*")) |
|      |           | Indexes=SCI-EXPANDED, SSCI, A&HCI, CPCI-S, CPCI-SSH, ESCI Timespan=All years                                                                                                                                                                                                                                                                                    |



|      |         |                                                                                                                                                                                          |
|------|---------|------------------------------------------------------------------------------------------------------------------------------------------------------------------------------------------|
| # 20 | 0       | TS=("medically-tailored" NEAR/2 "nutrition*")                                                                                                                                            |
|      |         | Indexes=SCI-EXPANDED, SSCI, A&HCI, CPCI-S, CPCI-SSH, ESCI Timespan=All years                                                                                                             |
| # 19 | 15,278  | TS=("dietetic*" or "dietitian*" or "dietician*" or "nutritionist*" or "dieteticien*" or "dietisten*" or "nutricionista*")                                                                |
|      |         | Indexes=SCI-EXPANDED, SSCI, A&HCI, CPCI-S, CPCI-SSH, ESCI Timespan=All years                                                                                                             |
| # 18 | 276,915 | #1 or #2 or #3 or #4 or #5 or #6 or #7 or #8 or #9 or #10 or #11 or #12 or #13 or #14 or #15 or #16 or #17                                                                               |
|      |         | Indexes=SCI-EXPANDED, SSCI, A&HCI, CPCI-S, CPCI-SSH, ESCI Timespan=All years                                                                                                             |
| # 17 | 47,515  | TS(("kidney transplant*" or "renal transplant*") and ("recipients" or "candidates" or "wait list" or "waiting list*"))                                                                   |
|      |         | Indexes=SCI-EXPANDED, SSCI, A&HCI, CPCI-S, CPCI-SSH, ESCI Timespan=All years                                                                                                             |
| # 16 | 15,463  | TI(("diabet*") and ("nephropath*" or "m\$croalbuminuri*" or "albuminuri*"))                                                                                                              |
|      |         | Indexes=SCI-EXPANDED, SSCI, A&HCI, CPCI-S, CPCI-SSH, ESCI Timespan=All years                                                                                                             |
| # 15 | 14,799  | TS((((("kidney" or "renal") NEAR/0 "disease") or "dialy*" or "ur\$emi*") and ("calcification" or "hyperparathyroidism" or ("left ventricul*" NEAR/1 "hypertroph*" or "hypercalc\$emia")) |
|      |         | Indexes=SCI-EXPANDED, SSCI, A&HCI, CPCI-S, CPCI-SSH, ESCI Timespan=All years                                                                                                             |
| # 14 | 78,183  | TS(("chronic*" or "severe" or "catheter*" or "pd" or "capd" or "hd") and ("dialy*" or "h\$emodialy*" or "renal replacement" or "azot\$emia"))                                            |
|      |         | Indexes=SCI-EXPANDED, SSCI, A&HCI, CPCI-S, CPCI-SSH, ESCI Timespan=All years                                                                                                             |
| # 13 | 19,411  | TS(("kidney" or "renal") and ("ckf" or "crd" or "crf" or "eskd" or "eskf" or "esrd" or "esrf"))                                                                                          |
|      |         | Indexes=SCI-EXPANDED, SSCI, A&HCI, CPCI-S, CPCI-SSH, ESCI Timespan=All years                                                                                                             |
| # 12 | 5,827   | TI("polycystic kidney*")                                                                                                                                                                 |
|      |         | Indexes=SCI-EXPANDED, SSCI, A&HCI, CPCI-S, CPCI-SSH, ESCI Timespan=All years                                                                                                             |

|      |        |                                                                              |
|------|--------|------------------------------------------------------------------------------|
| # 11 | 398    | TS=("renal hyperparathyroidism")                                             |
|      |        | Indexes=SCI-EXPANDED, SSCI, A&HCI, CPCI-S, CPCI-SSH, ESCI Timespan=All years |
| # 10 | 1,501  | TS=("calciophylaxis")                                                        |
|      |        | Indexes=SCI-EXPANDED, SSCI, A&HCI, CPCI-S, CPCI-SSH, ESCI Timespan=All years |
| # 9  | 3,196  | TI(("kidney" or "renal" or "interstitial") NEAR/0 "fibrosis")                |
|      |        | Indexes=SCI-EXPANDED, SSCI, A&HCI, CPCI-S, CPCI-SSH, ESCI Timespan=All years |
| # 8  | 1,696  | TS=("macroalbuminuri*")                                                      |
|      |        | Indexes=SCI-EXPANDED, SSCI, A&HCI, CPCI-S, CPCI-SSH, ESCI Timespan=All years |
| # 7  | 4,238  | TI(("nephrosclerosis" or "glomerulosclerosis" or "glomerular sclerosis")     |
|      |        | Indexes=SCI-EXPANDED, SSCI, A&HCI, CPCI-S, CPCI-SSH, ESCI Timespan=All years |
| # 6  | 40,365 | TI(("chronic" or "progressive") NEAR/0 ("kidney" or "renal" or "ur\$emi*"))  |
|      |        | Indexes=SCI-EXPANDED, SSCI, A&HCI, CPCI-S, CPCI-SSH, ESCI Timespan=All years |
| # 5  | 81,740 | TI(("h\$emodia*" or "dialys\$") or TS=("ckd"))                               |
|      |        | Indexes=SCI-EXPANDED, SSCI, A&HCI, CPCI-S, CPCI-SSH, ESCI Timespan=All years |
| # 4  | 58,019 | TI(("kidney" or "renal") NEAR/0 ("disease" or "insufficiency"))              |
|      |        | Indexes=SCI-EXPANDED, SSCI, A&HCI, CPCI-S, CPCI-SSH, ESCI Timespan=All years |
| # 3  | 56,353 | TS(("h\$emodialysis" or "dialysis" or "ur\$emic") NEAR/0 "patient*")         |
|      |        | Indexes=SCI-EXPANDED, SSCI, A&HCI, CPCI-S, CPCI-SSH, ESCI Timespan=All years |
| # 2  | 11,851 | TI(("end stage" or "endstage") NEAR/0 ("kidney" or "renal"))                 |
|      |        | Indexes=SCI-EXPANDED, SSCI, A&HCI, CPCI-S, CPCI-SSH, ESCI Timespan=All years |
| # 1  | 68,664 | TS(("chronic" or "diabetic" or "advanced") NEAR/0 "kidney")                  |
|      |        | Indexes=SCI-EXPANDED, SSCI, A&HCI, CPCI-S, CPCI-SSH, ESCI Timespan=All years |

Supplement 3. Funnel Plots Demonstrating Publication Bias for the Outcomes a) Serum Phosphorus Levels and b) Hyperphosphatemia

a.

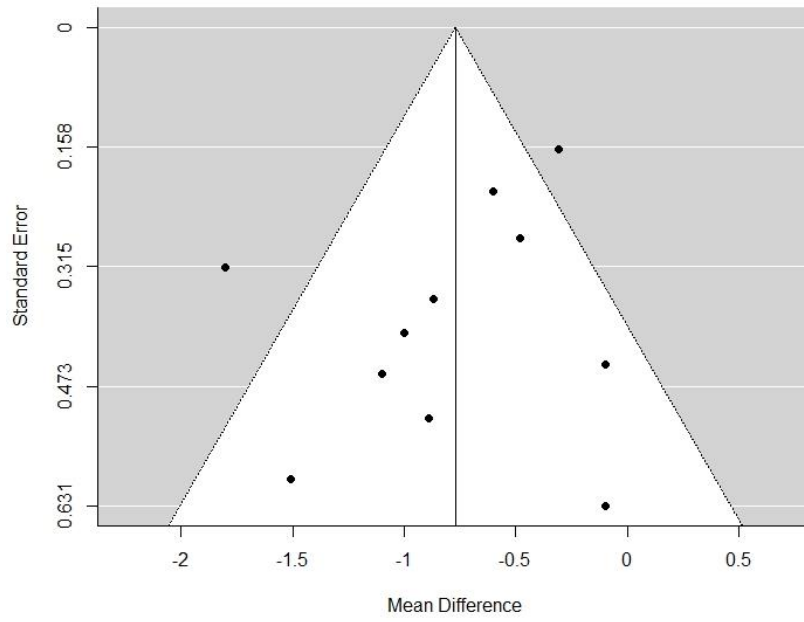

Egger regression test funnel plot asymmetry:  $z=-0.70$ ;  $p=0.48$

b.

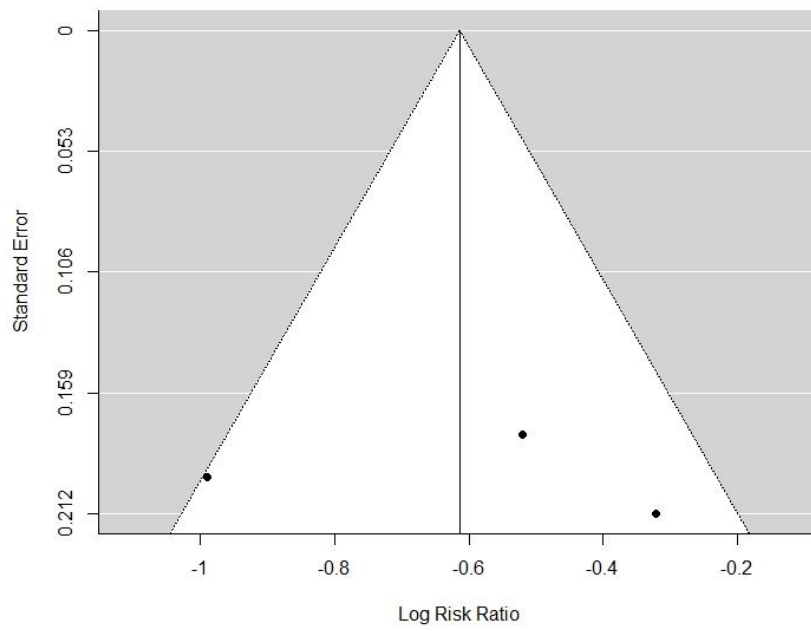

Egger regression test funnel plot asymmetry:  $z=0.23$ ;  $p=0.82$

Supplement 4. Sensitivity Analysis for Meta-Analysis Demonstrating the Effect of Phosphorus-Focused MNT Delivered by a Dietitian on Serum Phosphate Levels according to a) Baseline Serum Phosphate Levels  $\geq 5.5$  mg/dL and b) Study Risk of Bias

a.

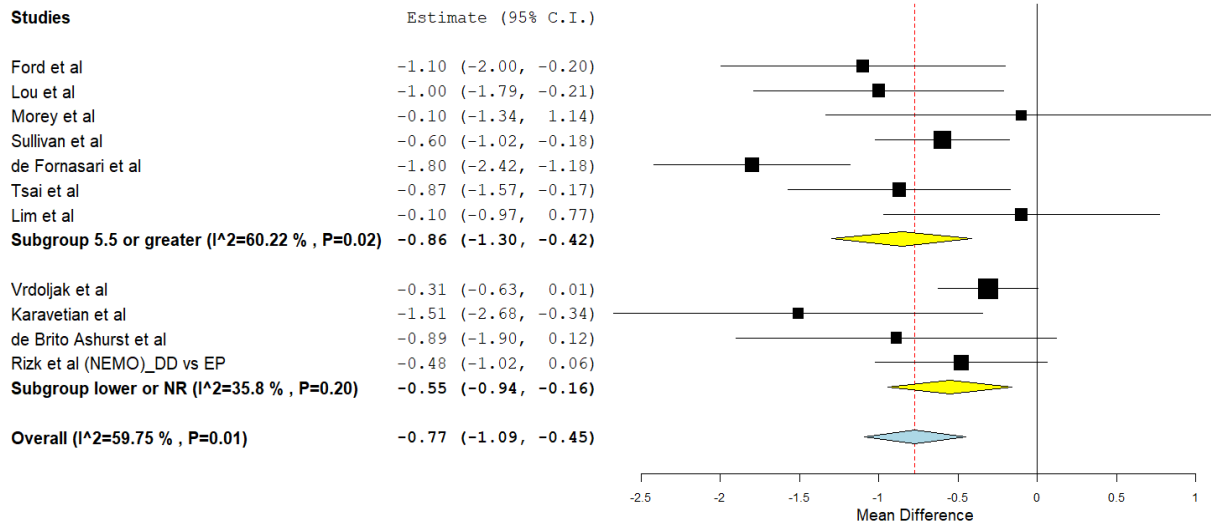

b.

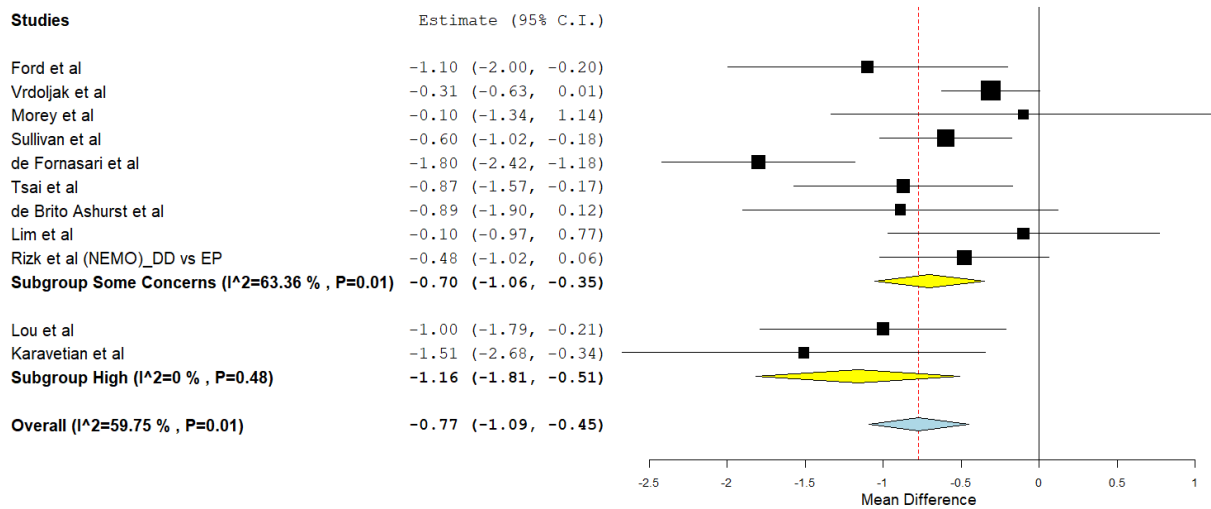

Supplement: CJN.09360620SupplementaryData.pdf [file CJN.09360620SupplementaryData.pdf]
